# Supplementary material
Source: PubMed Central journal article supplement (PMC7964749)
Supplement: 3066_table.pdf [file 3066_table.pdf]

**On-line Table: Demographics, clinical features, and MRI parameters of HC and patients with PD with and without FOG**

|                                                                        | HC ( <i>n</i> = 12)<br>(mean ± SD) | FOG+ ( <i>n</i> = 12)<br>(mean ± SD) | FOG− ( <i>n</i> = 12)<br>(mean ± SD) | <i>P</i> Value    |
|------------------------------------------------------------------------|------------------------------------|--------------------------------------|--------------------------------------|-------------------|
| Age                                                                    | 65.5 ± 6.17                        | 66.83 ± 4.78                         | 66.42 ± 6.32                         | .857 <sup>a</sup> |
| Gender (M/F)                                                           | 7:5                                | 8:4                                  | 8:4                                  | .743 <sup>b</sup> |
| Disease duration (yr)                                                  | N/A                                | 5.80 ± 2.29                          | 6.50 ± 2.88                          | .667 <sup>a</sup> |
| H&Y stage                                                              | N/A                                | 1.83 ± 0.44                          | 1.73 ± 0.34                          | .645 <sup>b</sup> |
| UPDRS I                                                                | N/A                                | 2.25 ± 1.6                           | 1.64 ± 1.80                          | .536              |
| UPDRS II                                                               | N/A                                | 11.33 ± 3.98                         | 6.36 ± 5.28                          | .531              |
| UPDRS III                                                              | N/A                                | 18.00 ± 9.18                         | 12.82 ± 7.56                         | .018 <sup>c</sup> |
| UPDRS IV                                                               | N/A                                | 3.08 ± 1.78                          | 1.73 ± 1.49                          | .157              |
| Symptom-dominant side (right/left)                                     | N/A                                | 4/8                                  | 4/8                                  | .062              |
| Tremor subscore <sup>d</sup>                                           | N/A                                | 3.27 ± 4.40                          | 2.27 ± 1.55                          | .667              |
| PIGD subscore <sup>e</sup>                                             | N/A                                | 4.27 ± 1.79                          | 1.54 ± 2.88                          | .491              |
| PIGD subscore without item 14 (freezing) score                         | N/A                                | 2.81 ± 1.66                          | 1.54 ± 2.88                          | .016 <sup>c</sup> |
| FOG-Q score                                                            | N/A                                | 12.17 ± 2.98                         | 3.36 ± 3.98                          | .220              |
| DA agonists dose equivalent to levodopa dosage (mg daily) <sup>f</sup> | N/A                                | 325.00 ± 131.76                      | 311.11 ± 176.38                      | .001 <sup>c</sup> |
| Daily levodopa dose (mg daily) <sup>g</sup>                            | N/A                                | 602.78 ± 338.30                      | 579.55 ± 325.35                      | .847              |
| GM volume (mL)                                                         | 860 ± 25                           | 807 ± 25                             | 851 ± 23                             | .878              |
| WM volume (mL)                                                         | 643 ± 10                           | 649 ± 13                             | 675 ± 15                             | .339 <sup>a</sup> |
| CSF volume (mL)                                                        | 245 ± 11                           | 260 ± 13                             | 242 ± 10                             | .223 <sup>b</sup> |
| TIV (mL)                                                               | 1749 ± 22                          | 1727 ± 21                            | 1768 ± 24                            | .266 <sup>a</sup> |
|                                                                        |                                    |                                      |                                      | .211 <sup>b</sup> |
|                                                                        |                                    |                                      |                                      | .500 <sup>a</sup> |
|                                                                        |                                    |                                      |                                      | .199 <sup>b</sup> |
|                                                                        |                                    |                                      |                                      | .967 <sup>a</sup> |
|                                                                        |                                    |                                      |                                      | .221 <sup>b</sup> |

**Note:**—N/A indicates not applicable; DA, dopamine agonist; H&Y, Hoehn and Yahr; TIV, total intracranial volume; PIGD, postural instability gait disturbances.

<sup>a</sup> HC versus patients with PD.

<sup>b</sup> Patients with FOG+ versus those with FOG−.

<sup>c</sup> Significant.

<sup>d</sup> Tremor subscore represents the sum of the following UPDRS items: 16, 20, 21.

<sup>e</sup> PIGD subscore represents the sum of the following UPDRS items: 13, 14, 15, 29, 30.

<sup>f</sup> Eleven of 12 patients with FOG+ and 10/12 patients with FOG− were treated with DA at commonly used dosages.

<sup>g</sup> Ten of 12 patients with FOG+ and 11/12 patients with FOG− were treated with levodopa.
